# Supplementary material for: Analysis and Prediction of Translation Rate Based on Sequence and Functional Features of the mRNA
Source: PLoS One. 2011 Jan 6;6(1):e16036. doi: 10.1371/journal.pone.0016036 (PMC3017080; doi:10.1371/journal.pone.0016036)
Supplement: Table S1 — The features for translation rate prediction in rich condition. (XLS) [file pone.0016036.s001.xls]

## Sheet: Sheet1
Table S1 - The features for translation rate prediction in rich condition
Order	Name	Feature Type	mRMR Score	Point-Biserial Correlation
1	ATA	Codon usage frequency	0.08	-0.364181
2	V123	Amino acids composition	0.024	0.217346
3	CGA	Codon usage frequency	0.023	-0.297473
4	TCC	Codon usage frequency	0.021	0.251689
5	NoofRNABindingProteins	Other (Number of RNA binding proteins known to bind its mRNA product)	0.021	0.223532
6	GCT	Codon usage frequency	0.018	0.279887
7	GO:0006421	GO (GO:0006421_asparaginyl-tRNA aminoacylation)	0.016	0.178712
8	V126	Amino acids composition	0.016	-0.180096
9	GGA	Codon usage frequency	0.014	-0.208428
10	cds.length	Other (Coding sequence length)	0.011	0.0974298
11	V72	Polarity	0.01	0.27959
12	CGG	Codon usage frequency	0.01	-0.18914
13	PA	Other (Protein abundance)	0.009	0.141562
14	GO:0005854	GO (GO:0005854_nascent polypeptide-associated complex)	0.01	0.156084
15	GO:0015629	GO (GO:0015629_actin cytoskeleton)	0.009	0.107548
16	GO:0043008	GO (GO:0043008_ATP-dependent protein binding)	0.008	0.128848
17	AGG	Codon usage frequency	0.01	-0.199043
18	CCA	Codon usage frequency	0.01	0.282777
19	ACC	Codon usage frequency	0.009	0.246181
20	GO:0034063	GO (GO:0034063_stress granule assembly)	0.008	0.139658
21	TGC	Codon usage frequency	0.009	-0.220759
22	GO:0006108	GO (GO:0006108_malate metabolic process)	0.008	0.121531
23	GO:0005737	GO (GO:0005737_cytoplasm)	0.009	0.242558
24	V71	Polarity	0.008	-0.195072
25	GCC	Codon usage frequency	0.008	0.268836
26	GO:0042802	GO (GO:0042802_identical protein binding)	0.007	0.0914266
27	GTA	Codon usage frequency	0.007	-0.212847
28	GO:0042277	GO (GO:0042277_peptide binding)	0.007	0.137845
29	GO:0005488	GO (GO:0005488_binding)	0.007	0.128071
30	CTT	Codon usage frequency	0.007	-0.203855
31	TCT	Codon usage frequency	0.007	0.194908
32	GO:0004758	GO (GO:0004758_serine C-palmitoyltransferase activity)	0.007	0.146001
33	TAT	Codon usage frequency	0.006	-0.188269
34	AAC	Codon usage frequency	0.006	0.14359
35	GO:0006878	GO (GO:0006878_cellular copper ion homeostasis)	0.006	0.134957
36	GO:0006417	GO (GO:0006417_regulation of translation)	0.006	0.217962
37	V55	Normalized Van Der Waals volume	0.006	-0.190227
